# Supplementary material for: HAPLN1 potentiates peritoneal metastasis in pancreatic cancer
Source: PubMed Central journal article supplement (PMC10126109; doi:10.1038/s41467-023-38064-w), 2023-04-24
Supplement: 41467_2023_38064_MOESM1_ESM.pdf [file 41467_2023_38064_MOESM1_ESM.pdf]

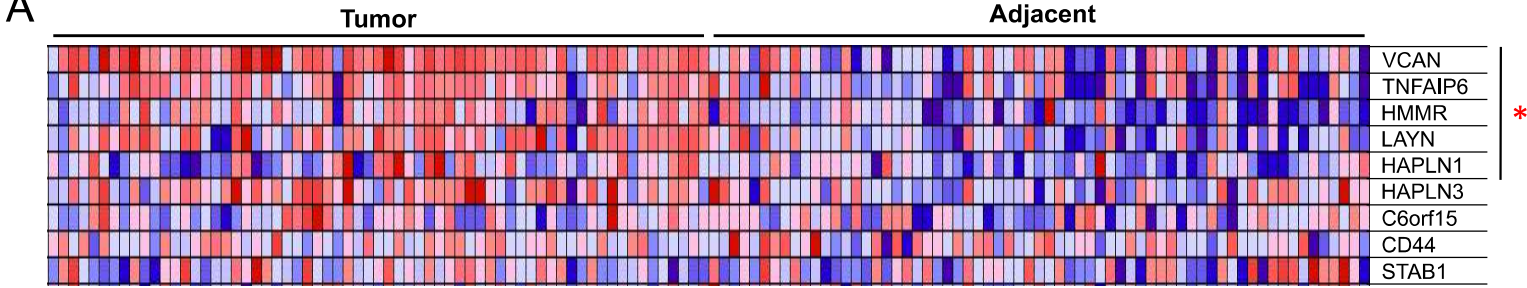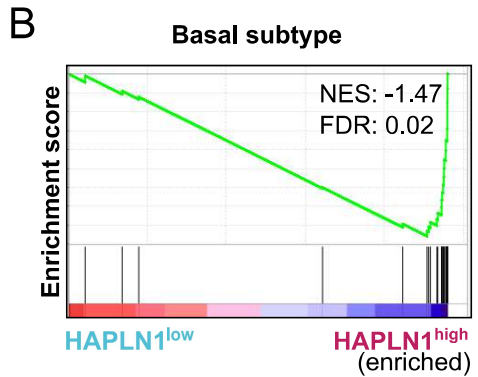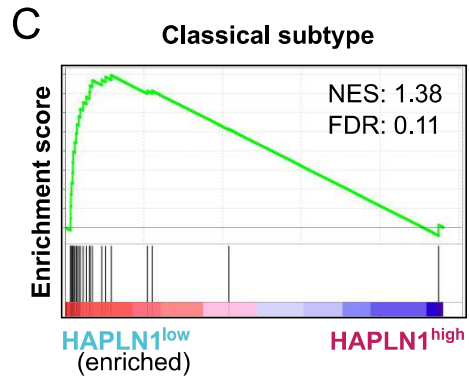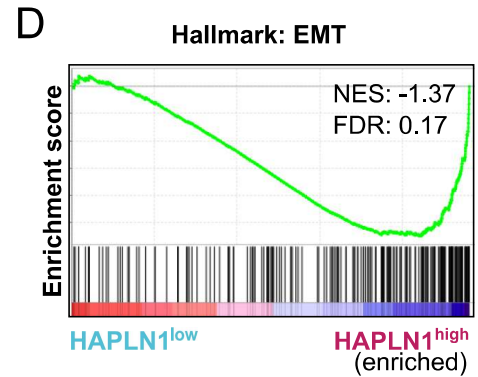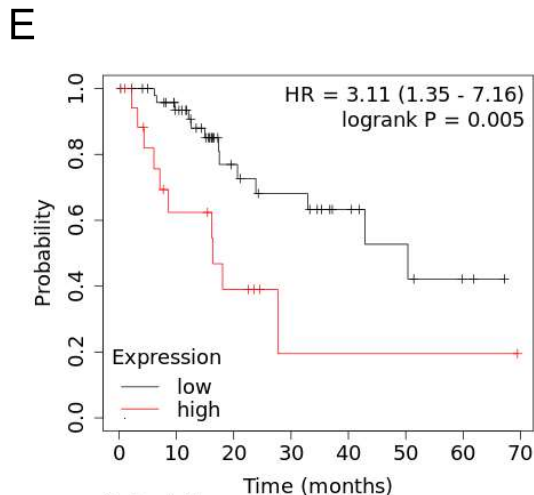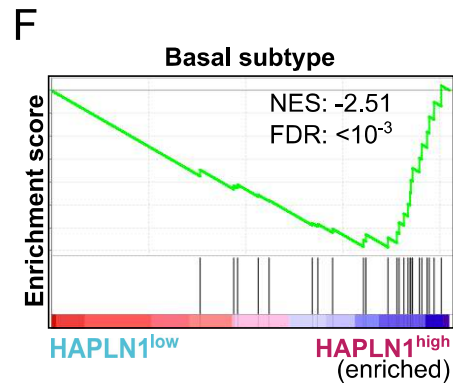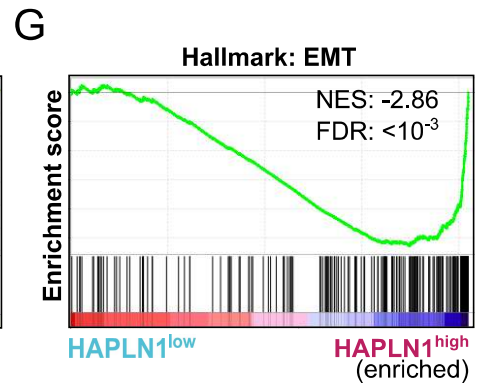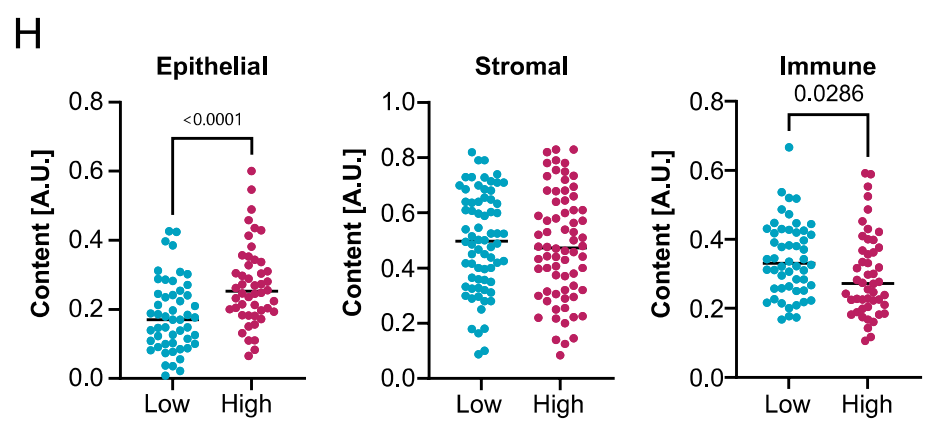

Supplementary Figure 1

**Supplementary Figure 1: HAPLN1 is upregulated in PDAC tissue and associated with worse disease outcome**

**A.** GSEA on GSE62452 (n=61 normal adjacent and n=69 PDAC tumor samples, (23)) on “Gene ontology for Hyaluronic Acid binding”. Leading edge genes significantly deregulated are marked with red star. **B-D.** GSEA on GSE50827. Before analysis PDAC patients were divided in *HAPLN1* high/low according to mean *HAPLN1* expression. Gene sets of “Basal subtype” (**B**), “Classical subtype” (**C**) or “Hallmark of Epithelial-to-Mesenchymal transition (EMT)” (**D**). n=69. **E.** Regression free survival plot using the KM-plotter tool and analyzing TCGA dataset. **F.** GSEA on TCGA dataset. Before analysis PDAC patients were divided in *HAPLN1* high/low according to mean *HAPLN1* expression. Gene sets of “Basal subtype” (**F**) or “Hallmark of Epithelial-to-Mesenchymal transition” (**G**). **H.** Cell component content analysis from the dataset published by Cao et al. <sup>23</sup>. Stromal: *HAPLN1*<sup>low</sup> n=70, *HAPLN1*<sup>high</sup> n=70; Epithelial: *HAPLN1*<sup>low</sup> n=51, *HAPLN1*<sup>high</sup> n=48; Immune: *HAPLN1*<sup>low</sup> n=52, *HAPLN1*<sup>high</sup> n=48;

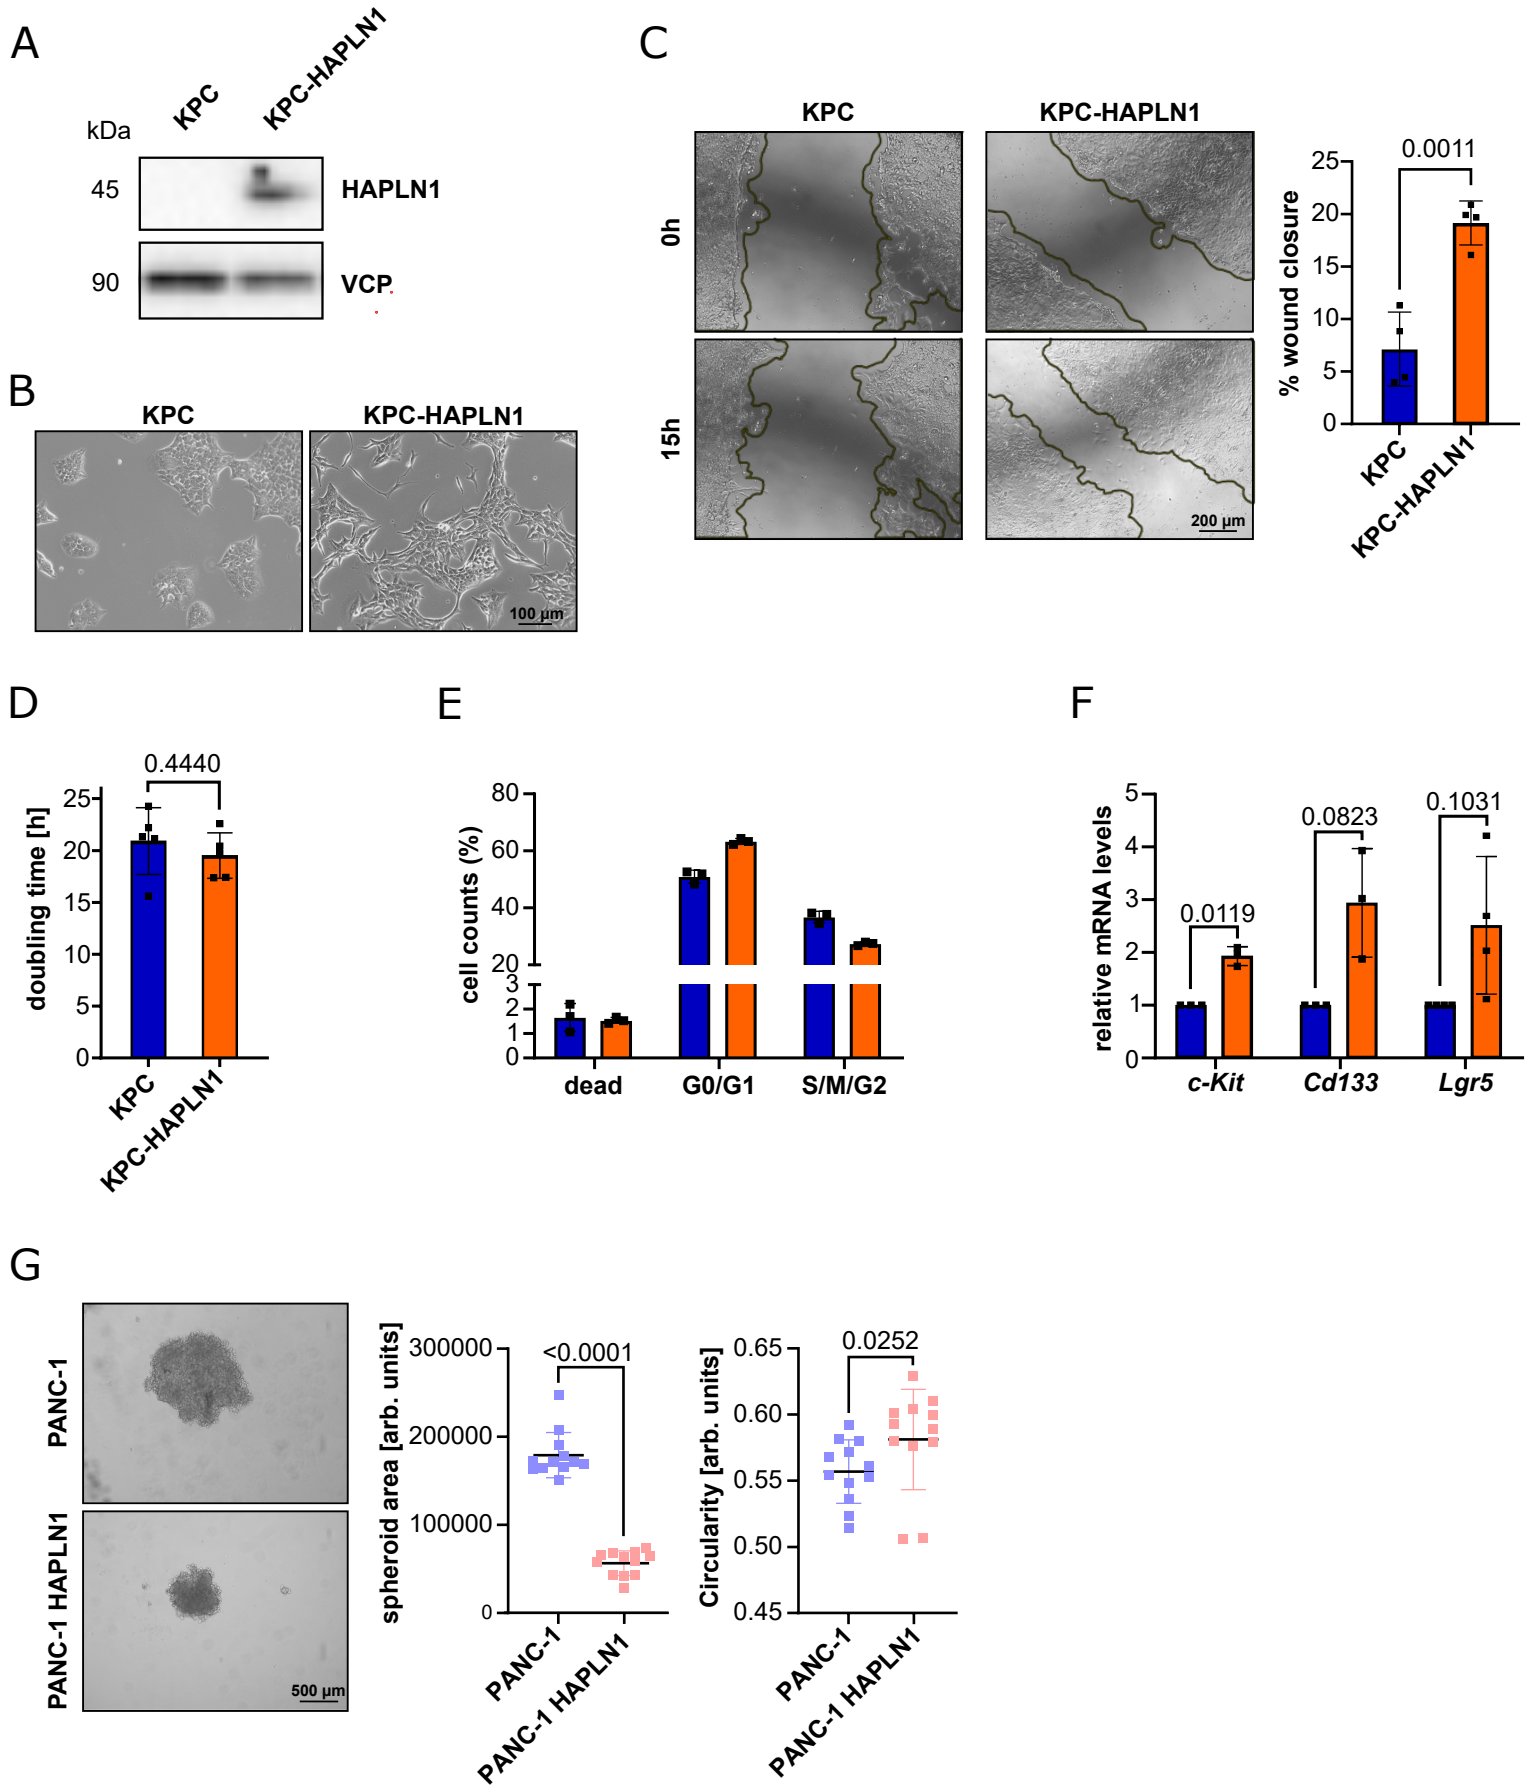

Supplementary Figure 2

## **Supplementary Figure 2: HAPLN1 induces EMT and ECM remodeling *in vitro***

**A.** Confirmation of HAPLN1 overexpression by Western blot analysis with VCP as house keeper. Representative image shown (n=2). **B.** Cellular morphology of stably transfected cells. Scale bar: 100  $\mu\text{m}$ . **C.** Scratch assay of KPC and KPC-HAPLN1 cells for 15 h. Closure was monitored by live cell imaging. Borders in the beginning (0 h) and in the end (15 h) are marked. n=4. Scale bar: 200  $\mu\text{m}$ . **D.** Doubling time of KPC and KPC-HAPLN1 assessed by cell counting. n=4. **E.** Cell cycle analysis of KPC (blue) and KPC-HAPLN1 (orange) cells. n=3. **F.** mRNA expression of stemness markers by qRT-PCR. n=3. **G.** PANC1 cells seeded in ultra-low attachment plates. Pictures taken after 48 h. Quantification of area as measure for proper spheroid formation. Scale bar 500  $\mu\text{m}$ . n=12. Graphs display mean $\pm$ SD. Data points mark independent biological replicates. For all data, unpaired two-tailed T test was applied, except for F where we performed paired two-tailed T test.

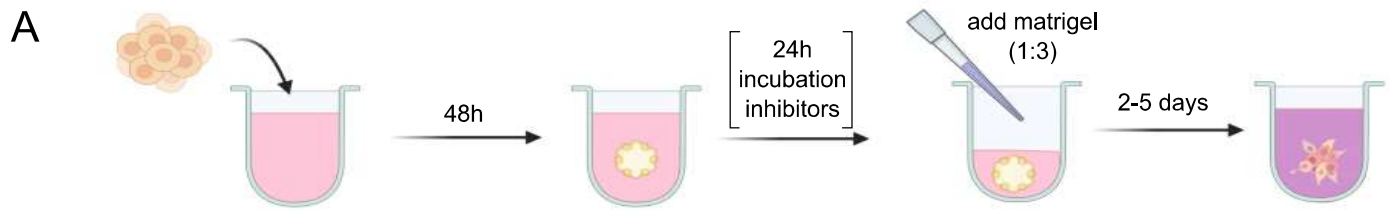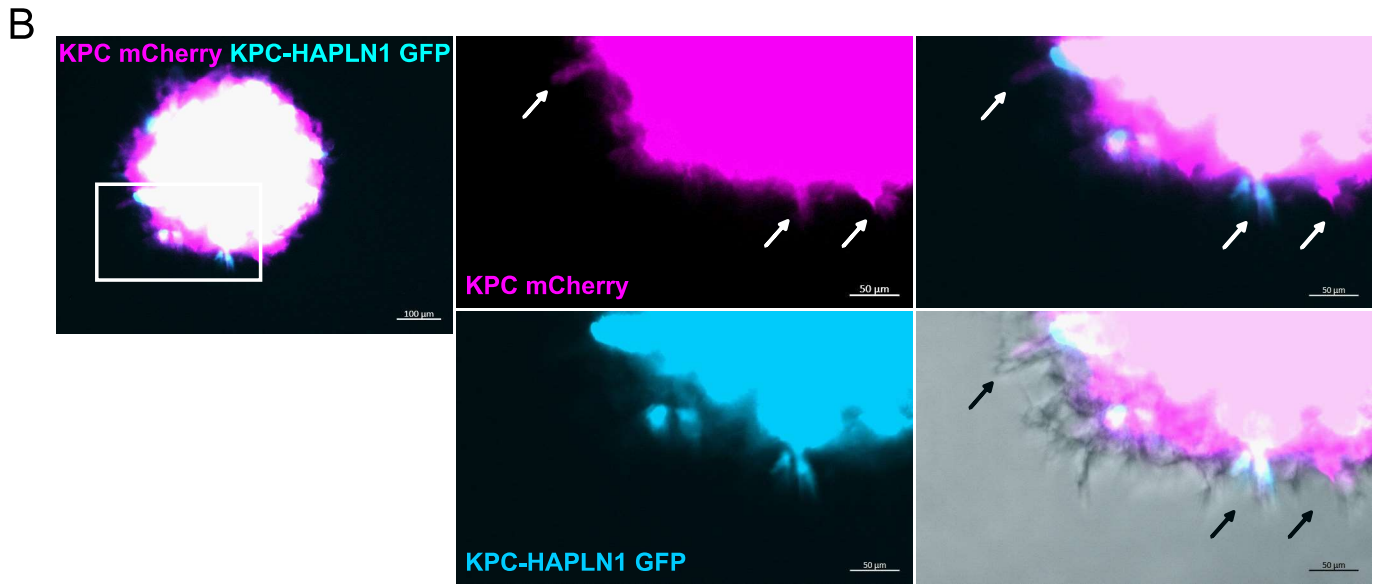

### **Supplementary Figure 3: HAPLN1 expression affects also neighboring cells**

**A.** Schematic overview of spheroid formation, possible treatment and embedding into Matrigel to assess invasive capacity. **B.** KPC and KPC-HAPLN1 cells were labeled by adenoviral infection with mCherry or GFP. Invasion was assessed after 48 h. Representative images of 3 independent experiments are shown. Scale bar: 100  $\mu\text{m}$ , zoom: 50  $\mu\text{m}$ .

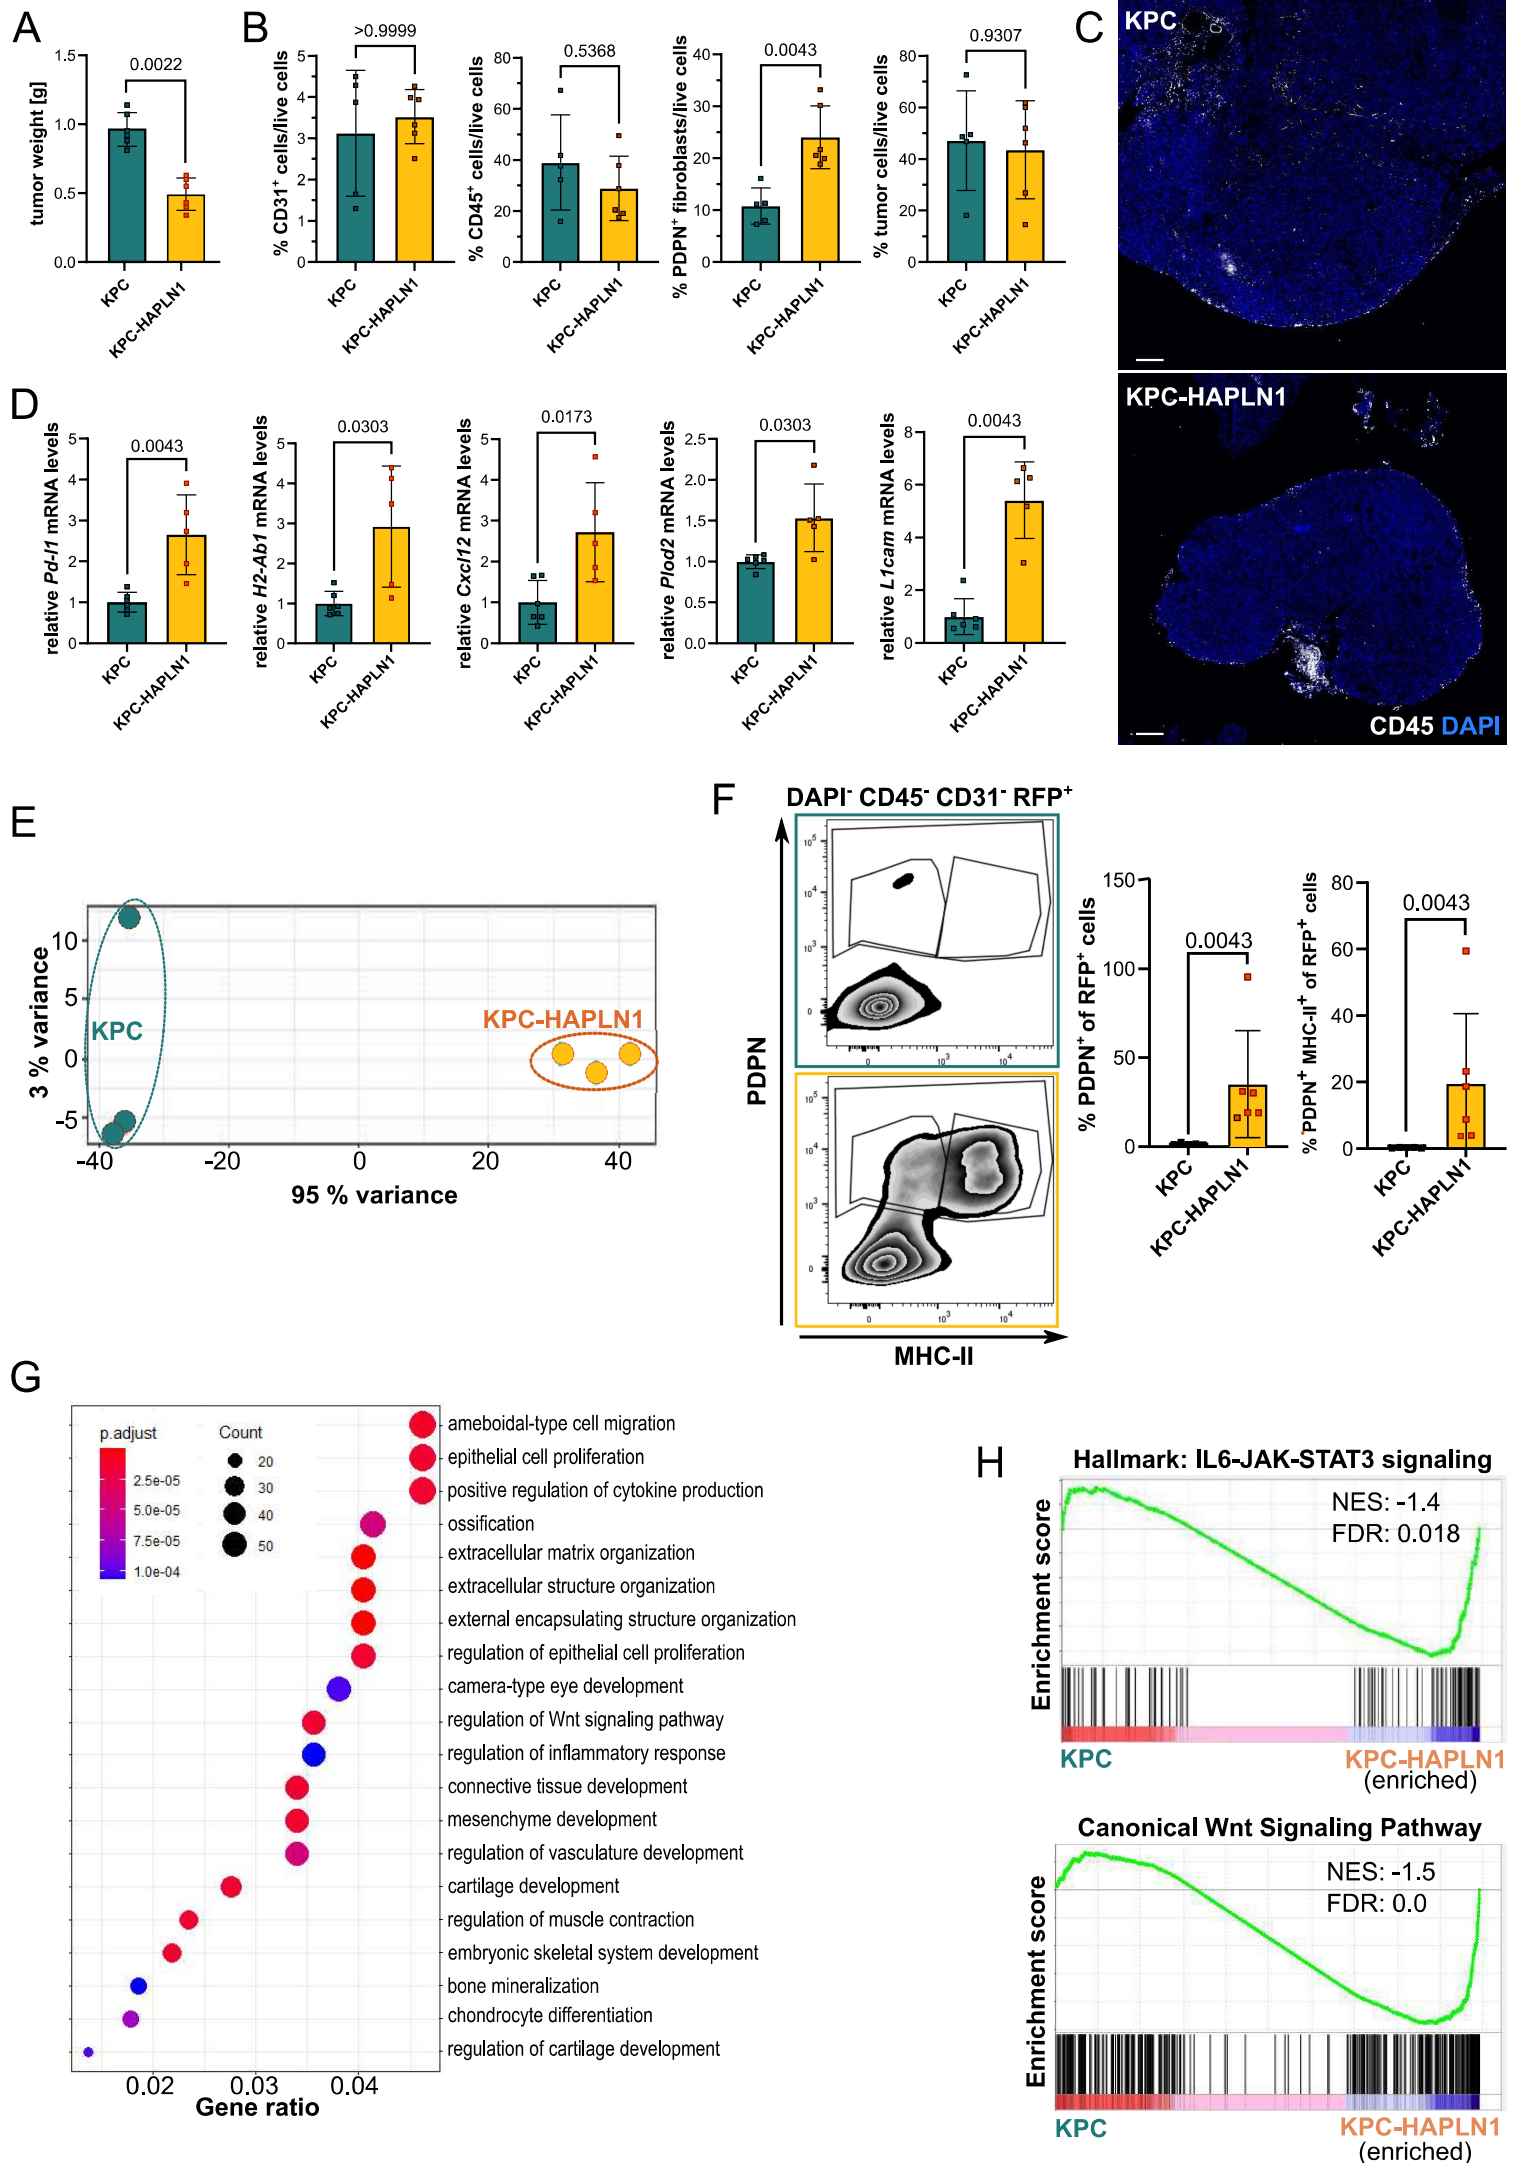

Supplementary Figure 4

#### **Supplementary Figure 4: HAPLN1 induces high plastic tumor cells *in vivo***

**A.** Solid tumor weight after 11 days of tumor growth. n=6. **B.** Analysis of tumor composition after digestion by flow cytometry. KPC n=5; KPC-HAPLN1 n=6. **C.** Immunofluorescence staining for CD45. One tumor nodule shown as representative image. KPC n=5; KPC-HAPLN1 n=6. **D.** qRT-PCR analysis of whole tumor mRNA. KPC n=6; KPC-HAPLN1 n=5. **E.** Principal component analysis (PCA) of isolated tumor cells send for RNA sequencing. Replicates of the same group are marked with same color. PC=principal component. **F.** Flow cytometric analysis of digested tumor samples. Representative plots of MHC-II and PDPN expression by tumor cells and quantification. KPC n=5; KPC-HAPLN1 n=6. **G.** Gene Ontology for 'Biological Process' of genes significantly upregulated in KPC-HAPLN1 cells compared to KPC. n=3. **H.** GSEA of RNAseq data of isolated tumor cells on "Hallmark of IL6-JAK-STAT3 signaling" and "Canonical Wnt Signaling Pathway" gene sets. Data points represent independent biological replicates, data shown is mean $\pm$ SD. Non-parametric two-tailed Mann-Whitney U test was applied.



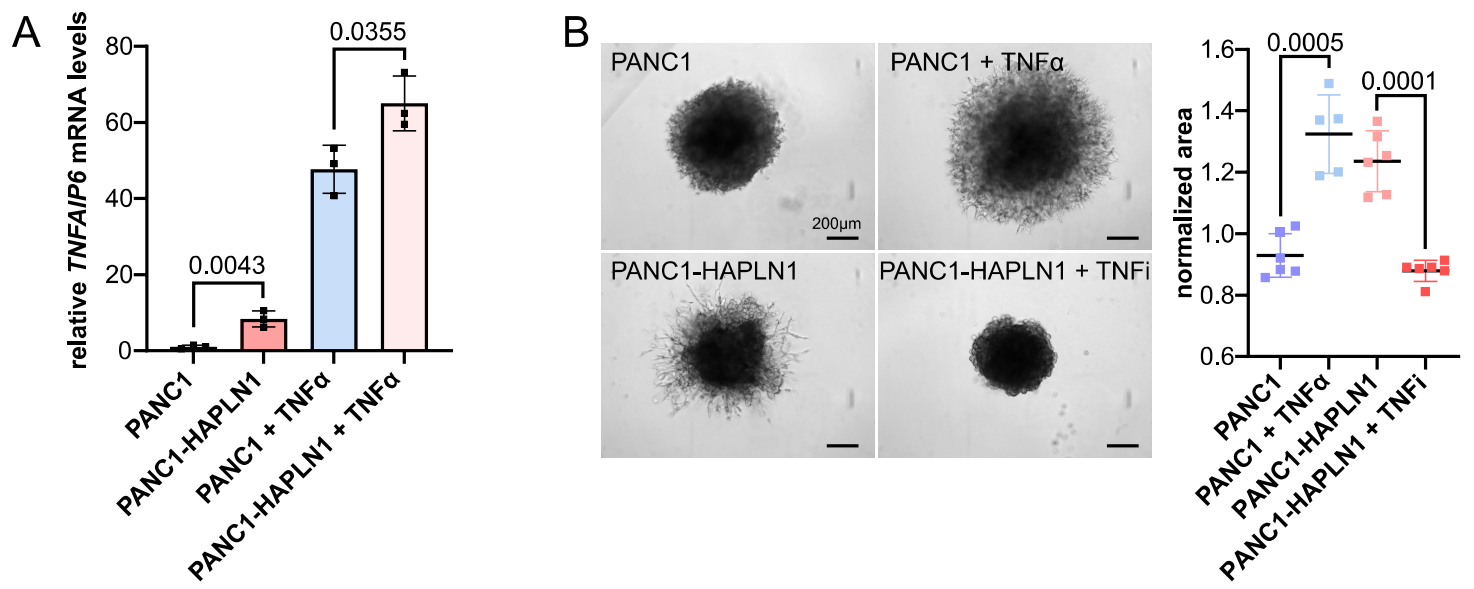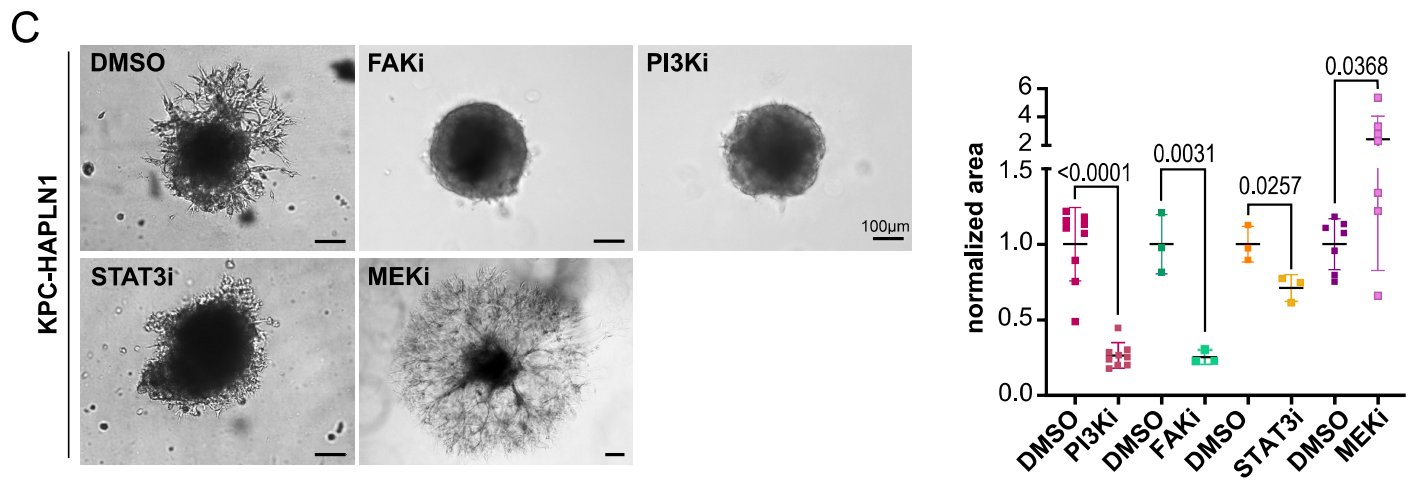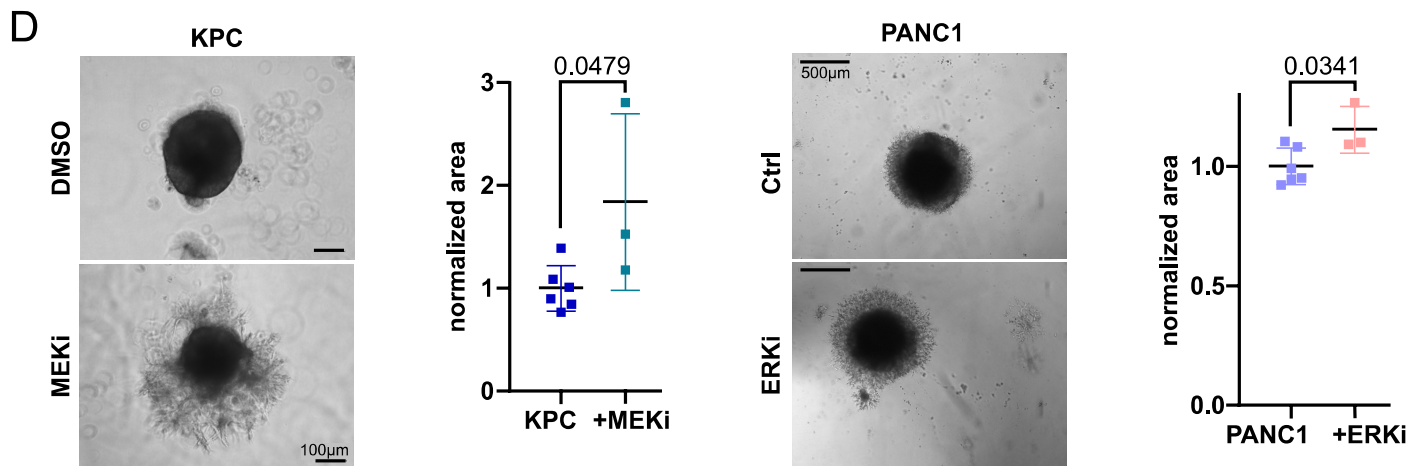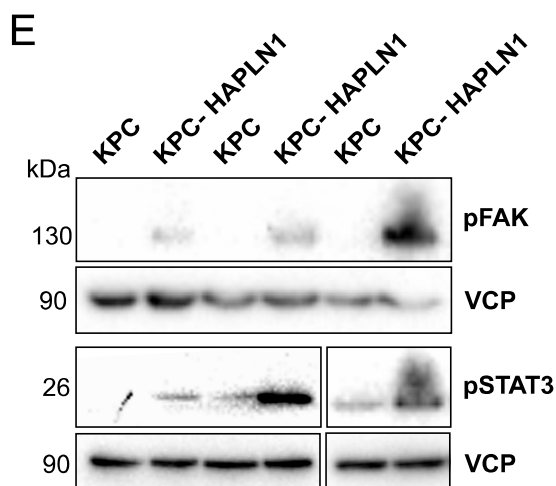

### **Supplementary Figure 5: Increased TNF signaling induces tumor cell plasticity**

**A.** Analysis of TNF-induced gene expression *in vitro*. Stimulation with 50 ng/ml recombinant TNF $\alpha$  for 6 h in starvation. n=4. **B.** Invasion assay into Matrigel of PANC1 stimulated or not with 50 ng/ml TNF $\alpha$  (upper panel) and PANC1-HAPLN1 treated or not with TNF $\alpha$  antagonist (lower panel). Invasion was measured as normalized occupied area 72 h after embedding. n=5. Scale bar: 500  $\mu$ m. **C.** KPC-HAPLN1 spheroids were pretreated with inhibitors before embedding into Matrigel. Invasion was assessed 72-96 h later. PI3Ki=10  $\mu$ M LY294002; FAKi=10  $\mu$ M GSK2256098; STAT3i=25  $\mu$ M Stattic; MEKi=50  $\mu$ M PD98059. Representative images (scale bar: 100  $\mu$ m) and quantification by assessing occupied area (PI3Ki n=9; FAKi, STAT3i n=3; ERKi n=7) are shown. **D.** KPC (left; n=6) or PANC1 (right; n=6) spheroids embedded in Matrigel after 48 h. Spheroids were pre-treated with DMSO, MEK inhibitor (MEKi; 50  $\mu$ M PD98059) (KPC; n=3) or ERK inhibitor (ERK Activation Inhibitor Peptide I; 1  $\mu$ M) (PANC1; n=3). Representative image shown. Scale bar: 100  $\mu$ m (KPC), 500  $\mu$ m (PANC1). **E.** Western blot analysis of STAT3 and FAK phosphorylation of untreated KPC or KPC-HAPLN1 cells. n=3. Graphs represent mean $\pm$ SD. Data points indicate independent biological replicates. Unpaired two-tailed T test was used for analysis of panels A-D.

**A**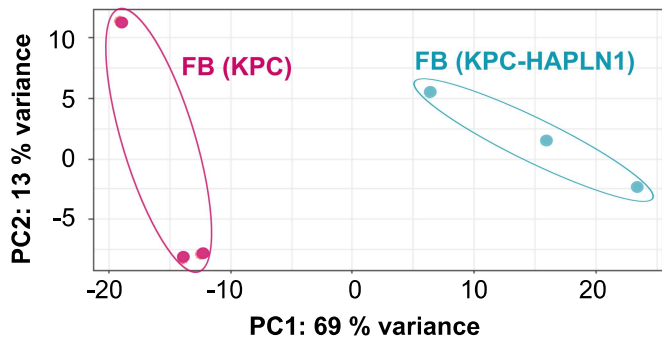**B**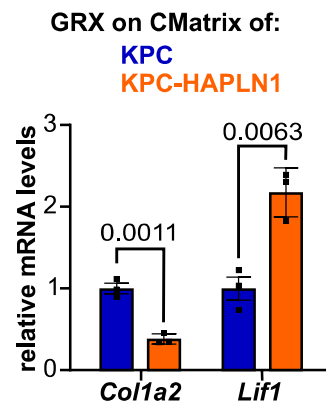**C**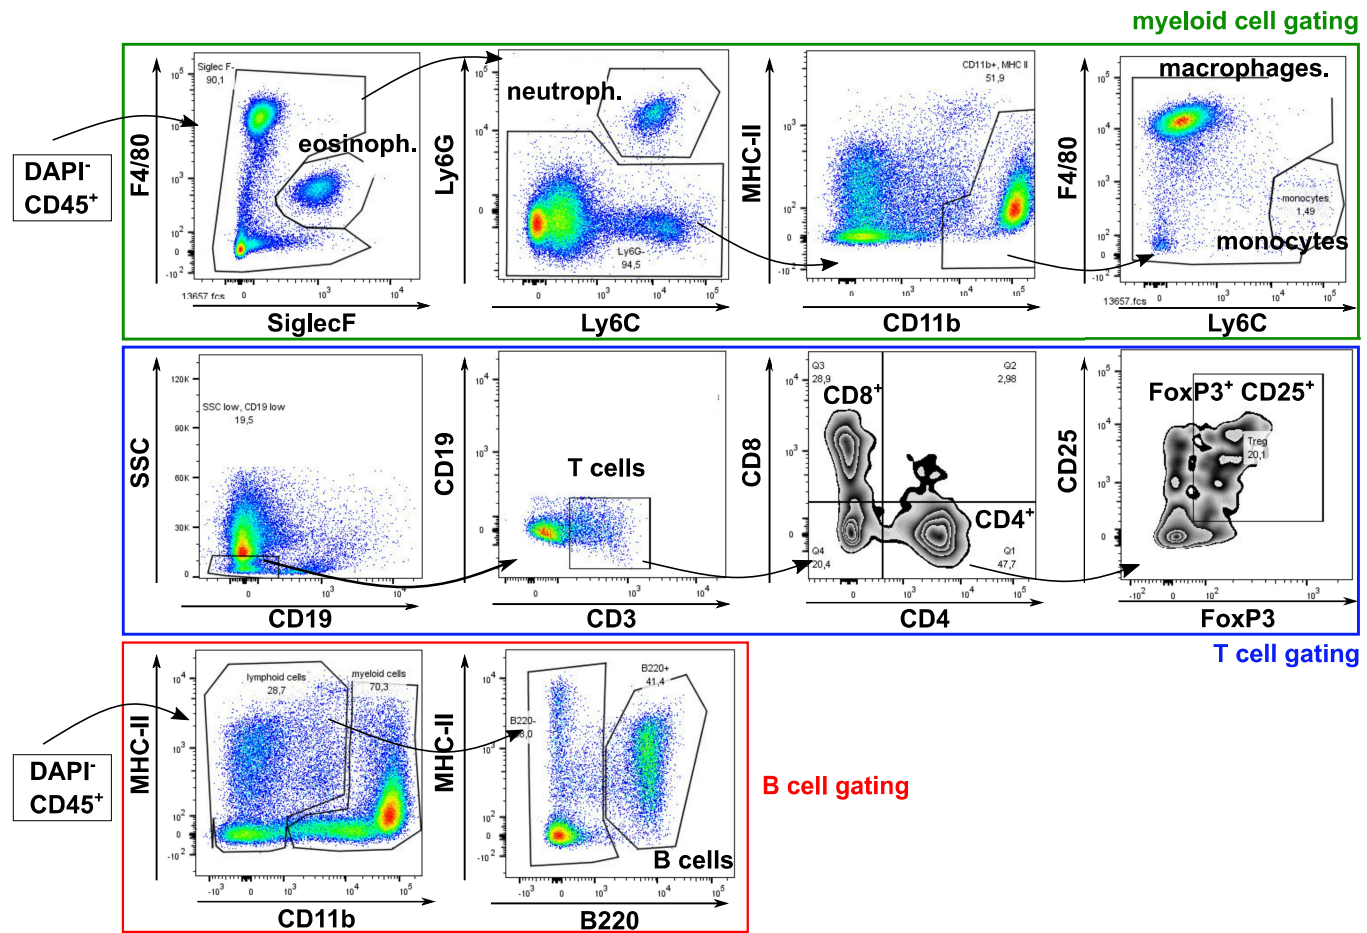**D**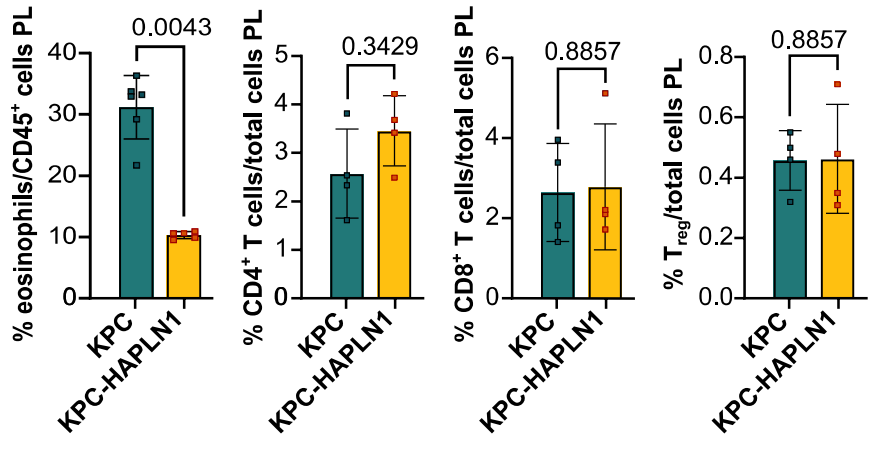**E**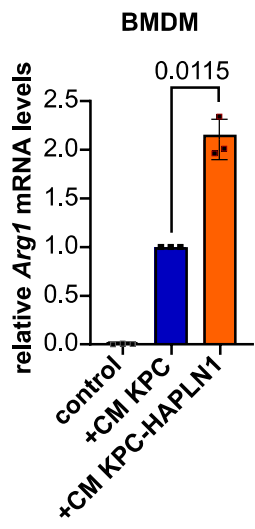

**Supplementary Figure 6: HAPLN1 modifies the immune microenvironment. A.**

Principal component analysis (PCA) of isolated fibroblasts (FB) of KPC or KPC-HAPLN1 tumors. **B.** GRX fibroblasts were cultured for 24 h on CMatrix of KPC or KPC-HAPLN1 cells. Gene expression of *Lif* and *Col1a2* are depicted. n=3. **C.** Gating of flow cytometric analysis of immune cell populations. Representative sample shown. **D.** Immune cell populations in the peritoneum assessed by flow cytometry. KPC n=5; KPC-HAPLN1 n=6, for eosinophils; n=4 for T cells. **E.** Bone marrow-derived macrophages (BMDMs) were treated with conditioned medium (CM) of KPC or KPC-HAPLN1 tumor cells for 24 h. Gene expression of *Arg1* was analyzed by qRT-PCR. n=3. Data points represent independent biological replicates, data shown is mean±SD. Non-parametric two-tailed Mann-Whitney U test was applied for panel D, unpaired two-tailed T test for panel B and paired two-tailed T test for panel E.

**A**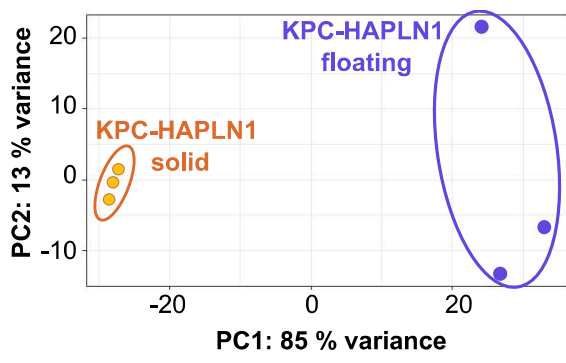**B**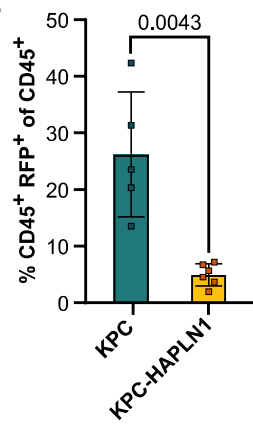**C**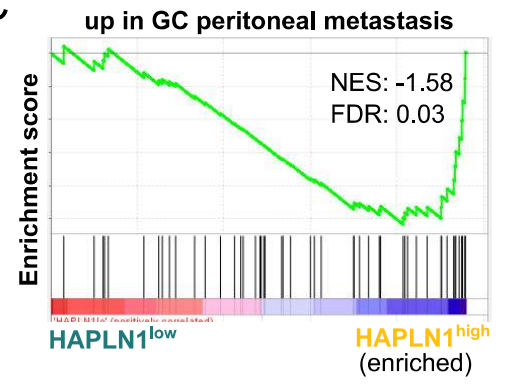

Supplementary Figure 7

**Supplementary Figure 7: HAPLN1 facilitates peritoneal colonization by tumor cells**

**A.** KPC-HAPLN1 cells from solid tumor and in suspension were isolated and send for RNAseq. Principal Component analysis (PCA) of the samples. n=3. **B.** Flow cytometric analysis of percentage of CD45+ RFP+ cells of immune cells after doublet exclusion. KPC n=5; KPC-HAPLN1 n=6. **C.** GSEA of GSE62452, dividing patients into HAPLN1 high/low according to their mean HAPLN1 expression. A gene set for genes upregulated in gastric cancer peritoneal metastasis was analyzed<sup>39</sup>. n=69. Data points represent independent biological replicates, data shown is mean±SD. Non-parametric two-tailed Mann-Whitney U test was applied for panel B.

**Supplementary Movie 1. Scratch assay of KPC cells.** KPC cells were cultured until confluence was achieved. Movie shows the migration on the scratch during 16 h.

**Supplementary Movie 2. Scratch assay of KPC-HAPLN1 cells.** KPC-HAPLN1 cells were cultured until confluence was achieved. Movie shows the migration on the scratch during 16 h.
