# Supplementary material for: HAPLN1 potentiates peritoneal metastasis in pancreatic cancer
Source: PubMed Central journal article supplement (PMC10126109; doi:10.1038/s41467-023-38064-w), 2023-04-24
Supplement: 41467_2023_38064_MOESM6_ESM.pdf [file 41467_2023_38064_MOESM6_ESM.pdf]

## Reporting Summary

Nature Portfolio wishes to improve the reproducibility of the work that we publish. This form provides structure for consistency and transparency in reporting. For further information on Nature Portfolio policies, see our [Editorial Policies](#) and the [Editorial Policy Checklist](#).

### Statistics

For all statistical analyses, confirm that the following items are present in the figure legend, table legend, main text, or Methods section.

n/a | Confirmed

- The exact sample size ( $n$ ) for each experimental group/condition, given as a discrete number and unit of measurement
- A statement on whether measurements were taken from distinct samples or whether the same sample was measured repeatedly
- The statistical test(s) used AND whether they are one- or two-sided  
*Only common tests should be described solely by name; describe more complex techniques in the Methods section.*
- A description of all covariates tested
- A description of any assumptions or corrections, such as tests of normality and adjustment for multiple comparisons
- A full description of the statistical parameters including central tendency (e.g. means) or other basic estimates (e.g. regression coefficient) AND variation (e.g. standard deviation) or associated estimates of uncertainty (e.g. confidence intervals)
- For null hypothesis testing, the test statistic (e.g.  $F$ ,  $t$ ,  $r$ ) with confidence intervals, effect sizes, degrees of freedom and  $P$  value noted  
*Give  $P$  values as exact values whenever suitable.*
- For Bayesian analysis, information on the choice of priors and Markov chain Monte Carlo settings
- For hierarchical and complex designs, identification of the appropriate level for tests and full reporting of outcomes
- Estimates of effect sizes (e.g. Cohen's  $d$ , Pearson's  $r$ ), indicating how they were calculated

*Our web collection on [statistics for biologists](#) contains articles on many of the points above.*

### Software and code

Policy information about [availability of computer code](#)

Data collection

Data analysis

For manuscripts utilizing custom algorithms or software that are central to the research but not yet described in published literature, software must be made available to editors and reviewers. We strongly encourage code deposition in a community repository (e.g. GitHub). See the Nature Portfolio [guidelines for submitting code & software](#) for further information.

### Data

Policy information about [availability of data](#)

All manuscripts must include a [data availability statement](#). This statement should provide the following information, where applicable:

- Accession codes, unique identifiers, or web links for publicly available datasets
- A description of any restrictions on data availability
- For clinical datasets or third party data, please ensure that the statement adheres to our [policy](#)

## Human research participants

Policy information about [studies involving human research participants and Sex and Gender in Research](#).

|                             |                                                                                                                                                                                                                                                                                                                   |
|-----------------------------|-------------------------------------------------------------------------------------------------------------------------------------------------------------------------------------------------------------------------------------------------------------------------------------------------------------------|
| Reporting on sex and gender | All patient data in this manuscript come from publicly available databases.                                                                                                                                                                                                                                       |
| Population characteristics  | Describe the covariate-relevant population characteristics of the human research participants (e.g. age, genotypic information, past and current diagnosis and treatment categories). If you filled out the behavioural & social sciences study design questions and have nothing to add here, write "See above." |
| Recruitment                 | Describe how participants were recruited. Outline any potential self-selection bias or other biases that may be present and how these are likely to impact results.                                                                                                                                               |
| Ethics oversight            | Identify the organization(s) that approved the study protocol.                                                                                                                                                                                                                                                    |

Note that full information on the approval of the study protocol must also be provided in the manuscript.

## Field-specific reporting

Please select the one below that is the best fit for your research. If you are not sure, read the appropriate sections before making your selection.

Life sciences       Behavioural & social sciences       Ecological, evolutionary & environmental sciences

For a reference copy of the document with all sections, see [nature.com/documents/nr-reporting-summary-flat.pdf](https://www.nature.com/documents/nr-reporting-summary-flat.pdf)

## Life sciences study design

All studies must disclose on these points even when the disclosure is negative.

|                 |                                                                                                                                                                                                                                 |
|-----------------|---------------------------------------------------------------------------------------------------------------------------------------------------------------------------------------------------------------------------------|
| Sample size     | Details regarding the sample size of all experiments are provided in Methods section and figure legends. Reasonable sample sizes were chosen to ensure they are sufficient for statistical comparison between different groups. |
| Data exclusions | No data were excluded from the analyses.                                                                                                                                                                                        |
| Replication     | In vitro experiments were completed at least in triplicate to successfully verify reproducibility.                                                                                                                              |
| Randomization   | All groups were assigned randomly. Littermate controls were used to make covariates not relevant.                                                                                                                               |
| Blinding        | Blind data collection and analysis was implemented.                                                                                                                                                                             |

## Reporting for specific materials, systems and methods

We require information from authors about some types of materials, experimental systems and methods used in many studies. Here, indicate whether each material, system or method listed is relevant to your study. If you are not sure if a list item applies to your research, read the appropriate section before selecting a response.

| Materials & experimental systems    |                                                                 | Methods                             |                                                    |
|-------------------------------------|-----------------------------------------------------------------|-------------------------------------|----------------------------------------------------|
| n/a                                 | Involvement in the study                                        | n/a                                 | Involvement in the study                           |
| <input type="checkbox"/>            | <input checked="" type="checkbox"/> Antibodies                  | <input checked="" type="checkbox"/> | <input type="checkbox"/> ChIP-seq                  |
| <input type="checkbox"/>            | <input checked="" type="checkbox"/> Eukaryotic cell lines       | <input type="checkbox"/>            | <input checked="" type="checkbox"/> Flow cytometry |
| <input checked="" type="checkbox"/> | <input type="checkbox"/> Palaeontology and archaeology          | <input checked="" type="checkbox"/> | <input type="checkbox"/> MRI-based neuroimaging    |
| <input type="checkbox"/>            | <input checked="" type="checkbox"/> Animals and other organisms |                                     |                                                    |
| <input checked="" type="checkbox"/> | <input type="checkbox"/> Clinical data                          |                                     |                                                    |
| <input checked="" type="checkbox"/> | <input type="checkbox"/> Dual use research of concern           |                                     |                                                    |

## Antibodies

|                 |                                                                                                                                           |
|-----------------|-------------------------------------------------------------------------------------------------------------------------------------------|
| Antibodies used | For western blot:<br>anti-HAS2 (1:500, Abcam, ab140671)<br>anti-VCP (1:5000, Abcam, ab109240)<br>anti-ACTB (1:5000, Sigma Aldrich, A5441) |
|-----------------|-------------------------------------------------------------------------------------------------------------------------------------------|

anti-LRRC15 (1:1000, Abcam, ab150376)  
 anti-E-Cadherin (1:2000, BD Biosciences, 610181)  
 anti-HAPLN1 (1:1000, Bio-Techne, AF2608)  
 Secondary antibodies goat anti-rabbit HRP  
 rabbit anti-mouse HRP (1:2500, DAKO, P0448, P0260)  
 donkey anti-goat HRP (1:2500, R&D, HAF109)  
 For flow cytometry:  
 B220-APC 1:100 BioLegend 103211  
 CD11b-BUV805 1:800 BD Biosciences 741934  
 CD11b-PE-Cy7 1:800 BD Biosciences 552850  
 CD19-Alexa700 1:50 BD Biosciences 557958  
 CD25-PE 1:200 Life Technologies 12-0251-82  
 CD31-APC 1:100 BD Biosciences 561814  
 CD3-PerCp-Cy5.5 1:50 BioLegend 100217  
 CD45-PerCp-Cy5.5 1:200 BD Biosciences 550994  
 CD45-FITC 1:400 BD Biosciences 553079  
 CD4-PE-Cy7 1:300 Life Technologies 25-0041-82  
 CD8-APC-Cy7 1:100 BD Biosciences 557654  
 DAPI (stock: 10,5 mM) 1:10.000 Life Technologies D3571  
 F4/80-Alexa Fluor 488 1:100 Life Technologies 53-4801-82  
 FoxP3-Alexa Fluor 488 1:50 BD Biosciences 560403  
 Ly6C-PE 1:200 BD Biosciences 560592  
 Ly6G-APC-Cy7 1:100 BD Biosciences 560600  
 MHC-II-BV510 1:100 BD Biosciences 742893  
 PDPN-APC-Cy7 1:100 BioLegend 127417  
 SiglecF-BUV395 1:100 BD Biosciences 740280

## Validation

All antibodies were validated by the manufacturers for antigen specificity and species reactivity as shown in the data sheets and attached references for each catalogue number.

## Eukaryotic cell lines

Policy information about [cell lines and Sex and Gender in Research](#)

Cell line source(s) KPC cell line was provided by Prof. Stephen Konieczny, at Purdue University

Authentication The cell lines were morphologically confirmed according to the information provided by Prof. Konieczny.

Mycoplasma contamination All cell lines showed negative for mycoplasma contamination

Commonly misidentified lines  
(See [ICLAC](#) register) No commonly misidentified cell lines were used in this study

## Animals and other research organisms

Policy information about [studies involving animals; ARRIVE guidelines](#) recommended for reporting animal research, and [Sex and Gender in Research](#)

Laboratory animals For mouse experiments, 9-11 weeks female C57BL/6J mice were purchased from Janvier Labs.

Wild animals No wild animals were used in this study

Reporting on sex Sex was not consider to have a role on the effects observed.

Field-collected samples This study did not involve field-collected samples.

Ethics oversight All mouse experiments were approved by the local authorities (RP Karlsruhe and DKFZ) and carried out following their legal requirements and in accordance to the 3Rs principles.

Note that full information on the approval of the study protocol must also be provided in the manuscript.

## Flow Cytometry

### Plots

Confirm that:

- The axis labels state the marker and fluorochrome used (e.g. CD4-FITC).
- The axis scales are clearly visible. Include numbers along axes only for bottom left plot of group (a 'group' is an analysis of identical markers).
- All plots are contour plots with outliers or pseudocolor plots.
- A numerical value for number of cells or percentage (with statistics) is provided.

### Methodology

Sample preparation

For flow cytometry and cell sorting, solid tumors were digested using 2,5 mg/ml Collagenase D (Sigma Aldrich, 11088866001), 0,5 mg/ml Liberase DL (Sigma Aldrich, 5466202001) and 0,2 mg/ml DNase (Sigma Aldrich, 10104159001) in 10 % FCS DMEM for 45 min at 37 °C after mincing thoroughly. If peritoneal lavage contained erythrocytes, red blood cell lysis was performed with RBC Lysis Buffer (Life Technologies, 00-4333-57).

Instrument

Analysis by flow cytometry was performed on a BD LSR Fortessa, while BD FACS Aria/BD FACS Aria Fusion Sorters were used for cell sorting.

Software

FlowJo Software was used for analysis of the acquired samples.

Cell population abundance

Solid tumors contained a mean of 40% tumor cells, determined as CD45-/CD31-/RFP+. Fibroblasts content was between 10 and 20% of live cells, determined by CD45-/CD31-/RFP-/PDPN+. Macrophages were 15% or 45% of the immune populations in the peritoneal cavity, determined by CD45+/CD11b-high/F4/80+. Stringent gating strategies were applied to ensure purity.

Gating strategy

Tumor cells: DAPI-/CD45-/CD31-/RFP+.  
 Fibroblasts: DAPI-/CD45-/CD31-/RFP-/PDPN+  
 Macrophages: DAPI-/CD45+/CD11b-high/F4/80+  
 Neutrophils: DAPI-/CD45+/CD11b+/Ly6G+  
 Monocytes: DAPI-/CD45+/CD11b+/Ly6Chigh  
 B cells: DAPI-/CD45+/CD11b- and int/MHC-II+/B220+  
 Eosinophils: DAPI-/CD45+/CD11b+/SiglecF+

- Tick this box to confirm that a figure exemplifying the gating strategy is provided in the Supplementary Information.
